# Supplementary material for: Effect of Mean Stress on the Fatigue Life Prediction of Notched Fiber‐Reinforced 2060 Al‐Li Alloy Laminates under Spectrum Loading
Source: Hindawi journal article supplement (doi:10.1155/2018/5728174), 2018-01-01
Supplement: f1 [file 5728174.f1.pdf]

## SUPPLEMENTAL FILES

Figure

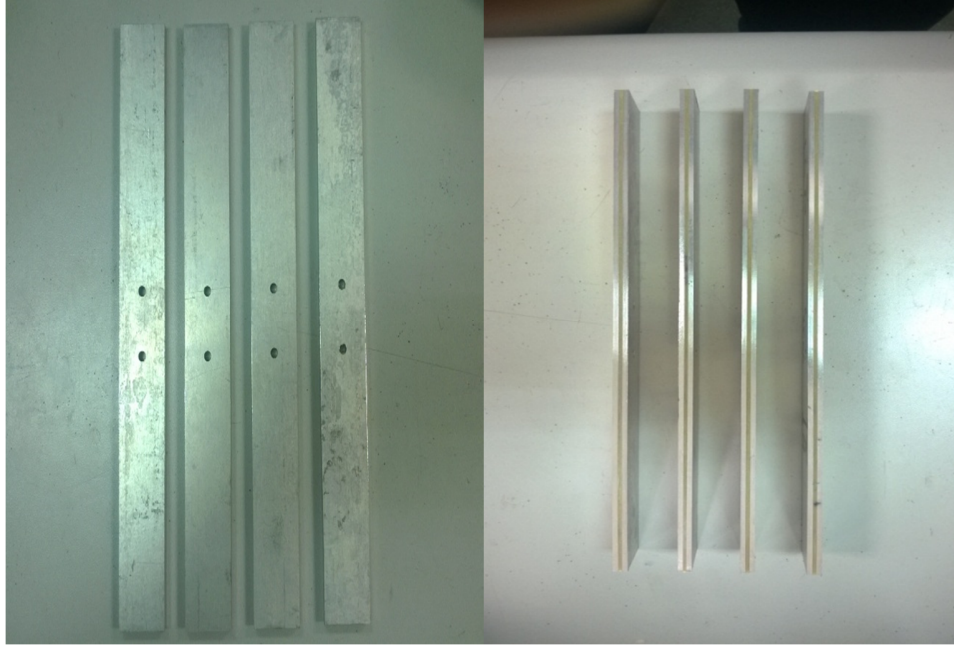

*(a) Fatigue test specimen of the 2/1 laminates*

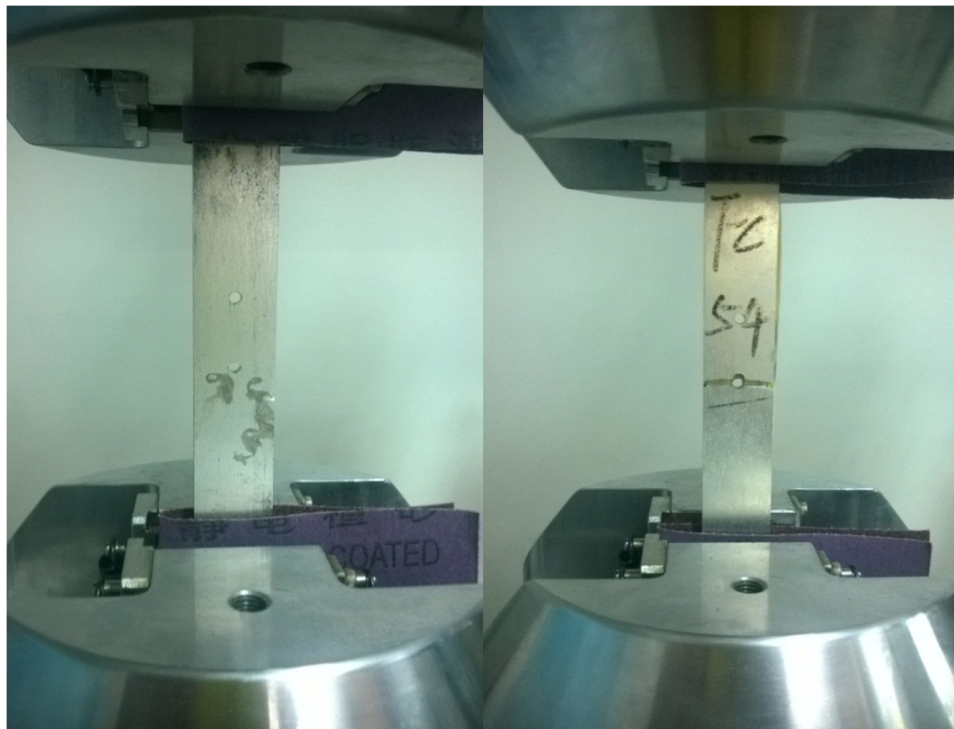

*(b) Testing process and failure mode for the 2/1 laminates*

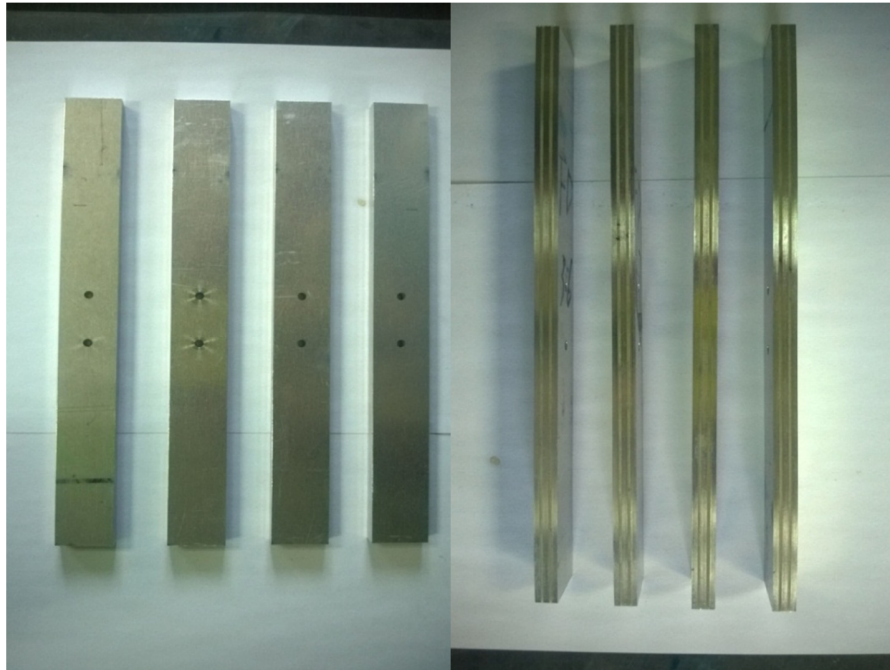

*(c) Fatigue test specimen of the 3/2 laminates*

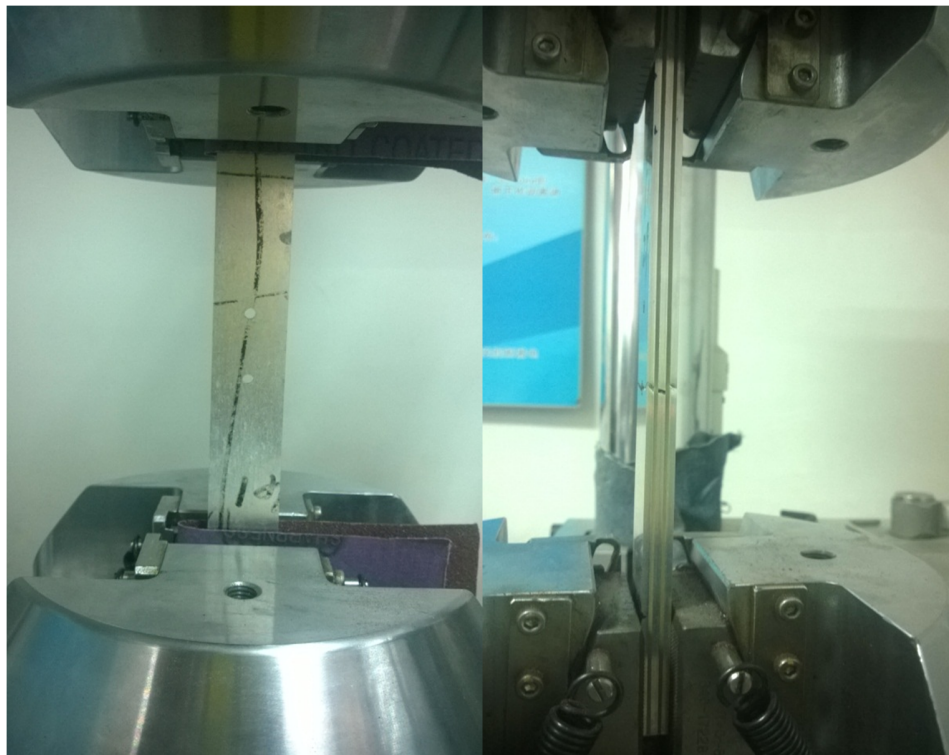

*(d) Testing process and failure mode for the 3/2 laminates*

*Fig.1 The case of sample and test*

# Table

*Table 1 Fatigue test data of different materials under different loadings*

| material         | Loading mode                    | $S_{\max}$<br>/MPa | $N$<br>/cycle |
|------------------|---------------------------------|--------------------|---------------|
| 2/1<br>Laminates | Constant<br>amplitude<br>R=0.06 | 200                | 60745         |
|                  |                                 |                    | 22637         |
|                  |                                 |                    | 38244         |
|                  |                                 |                    | 29473         |
|                  |                                 |                    | 29897         |
|                  |                                 |                    |               |
|                  |                                 | 120                | 139524        |
|                  |                                 |                    | 106297        |
|                  |                                 |                    | 312644        |
|                  |                                 |                    | 110031        |
|                  |                                 |                    | 109479        |
|                  |                                 |                    |               |
|                  |                                 | 100                | 268983        |
|                  |                                 |                    | 245478        |
|                  |                                 |                    | 304877        |
|                  |                                 |                    | 360000        |
|                  |                                 |                    | 196304        |
|                  |                                 |                    |               |
| 3/2<br>Laminates | Constant<br>amplitude<br>R=0.06 | 160                | 69437         |
|                  |                                 |                    | 66248         |
|                  |                                 |                    | 58370         |
|                  |                                 |                    | 55767         |
|                  |                                 |                    |               |
|                  |                                 |                    |               |
|                  |                                 | 140                | 89895         |
|                  |                                 |                    | 96748         |
|                  |                                 |                    | 113595        |
|                  |                                 |                    | 129731        |
|                  |                                 |                    | 122911        |
|                  |                                 |                    |               |
|                  |                                 | 110                | 295664        |
|                  |                                 |                    | 318784        |
|                  |                                 |                    | 265702        |
|                  |                                 |                    | 308466        |
|                  |                                 |                    | 301285        |
|                  |                                 |                    |               |
| 2/1<br>Laminates | Constant<br>amplitude<br>R=-1   | 120                | 37246         |
|                  |                                 |                    | 35159         |
|                  |                                 |                    | 37851         |
|                  |                                 |                    | 40479         |
|                  |                                 |                    |               |
|                  |                                 |                    |               |
|                  |                                 | 100                | 80143         |
|                  |                                 |                    | 76765         |
|                  |                                 |                    | 71330         |
|                  |                                 |                    | 78157         |
|                  |                                 |                    | 75322         |
|                  |                                 |                    |               |
|                  |                                 | 60                 | 798661        |
|                  |                                 |                    | 351355        |
|                  |                                 |                    | 566372        |
|                  |                                 |                    | 596657        |
|                  |                                 |                    |               |
|                  |                                 |                    |               |

|                  |                               |     |        |
|------------------|-------------------------------|-----|--------|
| 3/2<br>Laminates | Constant<br>amplitude<br>R=-1 | 120 | 48970  |
|                  |                               |     | 47399  |
|                  |                               |     | 54265  |
|                  |                               |     | 49113  |
|                  |                               |     | 51503  |
|                  |                               | 100 | 104798 |
|                  |                               |     | 97001  |
|                  |                               |     | 89640  |
|                  |                               |     | 104443 |
|                  |                               |     | 110322 |
|                  |                               | 80  | 339013 |
|                  |                               |     | 265884 |
|                  |                               |     | 305719 |
|                  |                               |     | 303384 |
|                  |                               |     | 385232 |
| 2/1<br>Laminates | Mini-Twist                    | 175 | 46220  |
|                  |                               |     | 61914  |
|                  |                               |     | 55242  |
|                  |                               |     | 76048  |
|                  |                               |     | 108584 |
|                  |                               | 155 | 197652 |
|                  |                               |     | 178955 |
|                  |                               |     | 125053 |
|                  |                               | 130 | 348877 |
|                  |                               |     | 262398 |
|                  |                               |     | 273966 |
|                  |                               |     | 430206 |
|                  |                               | 180 | 74364  |
|                  |                               |     | 79897  |
|                  |                               |     | 64793  |
|                  |                               |     | 72971  |
|                  |                               | 170 | 123424 |
|                  |                               |     | 124073 |
|                  |                               |     | 115449 |
|                  |                               |     | 125603 |
|                  |                               | 140 | 247652 |
|                  |                               |     | 248301 |
|                  |                               |     | 258893 |
|                  |                               |     | 261405 |

---
